# Supplementary material for: Hexaruthenium cluster complexes of basal edge-bridged square pyramidal metallic skeleton. First efficient synthesis and reactivity studies
Source: Royal Society of Chemistry journal article supplement (doi:10.1039/b305551e), 2003-01-01
Supplement: b305551e.doc [file b305551e.doc]

Supplementary Material for Dalton Transactions

This journal is © The Royal Society of Chemistry 2003

ELECTRONIC SUPPLEMENTARY INFORMATION

for

**Hexaruthenium cluster complexes of basal edge-bridged square pyramidal metallic skeleton. First efficient synthesis and reactivity studies**

by

**Javier A. Cabeza,*,a Ignacio del Río,a Pablo García-Álvarez,a**

**Víctor Riera,a Marta Suáreza and Santiago García-Granda,b**

**a**Departamento de Química Orgánica e Inorgánica, Universidad de Oviedo,

E-33071 Oviedo, Spain

**b**Departamento de Química Física y Analítica, Universidad de Oviedo,

E-33071 Oviedo, Spain

**(A) SYNTHETIC AND SPECTROSCOPIC DATA FOR THE NEW COMPOUNDS**

**General Experimental Data.** Solvents were dried over sodium diphenyl ketyl (THF, diethyl ether, hydrocarbons) or CaH2 (dichloromethane, 1,2-dichloroethane) and distilled under nitrogen prior to use. The reactions were carried out under nitrogen, using Schlenk-vacuum line techniques, and were routinely monitored by solution IR spectroscopy (carbonyl stretching region) and spot TLC. The xylene used was a mixture of isomers. IR spectra were recorded in solution on a Perkin-Elmer Paragon 1000 FT spectrophotometer. NMR spectra were run at room temperature on a Bruker DPX-300 instrument, using the dichloromethane solvent resonance as internal standard for 1H ( = 5.33) or 85% aqueous H3PO4 as external standard for 31P ( = 0). Microanalyses were obtained from the University of Oviedo Analytical Service. FAB-MS were obtained from the University of Santiago de Compostela Mass Spectrometric Service; data given refer to the most abundant molecular ion isotopomer.

**[Ru6(µ3-H)2(µ5-2-apyH)(µ-CO)2(CO)14] (2a).** A solution of [Ru3(CO)12] (272 mg, 0.425 mmol) and 2-aminopyridine (20 mg, 0.212 mmol) in xylene (10 mL) was heated at reflux temperature for 1 h. The color changed from orange to dark brown. The reaction mixture was cooled down to room temperature, hexane (20 mL) was added with stirring, and the Schlenk tube was kept at –20 oC for 24 h. The solvent was decanted off and the solid residue was dissolved in THF (30 mL). The solution was filtered and the filtrate evaporated to dryness to give a dark brown, nearly black, solid that was washed with hexane (3  3 mL) and dried under vacuum (171 mg, 70%). Calcd for C21H6N2O16Ru6 (fw = 1148.71): C, 21.96; H, 0.53; N, 2.44. Found: C, 21.86; H, 0.54; N, 2.43. Positive FAB MS: *m/z* = 1150 [*M*+]. IR (CH2Cl2): (CO) = 2095 (m), 2071 (s), 2049 (s), 2033 (vs), 2019 (s, sh), 1996 (m, sh), 1973 (m, br), 1954 (w, sh), 1861 (w, br), 1828 (w, br) cm-1. 1H NMR (CD2Cl2, 293 K):  = 7.77 (dd, *J* = 5.5, 1.4 Hz, 1 H), 7.22 (ddd, *J* = 8.7, 7.2, 1.4 Hz, 1 H), 6.59 (ddd, *J* = 7.2, 5.5, 1.1 Hz, 1 H), 5.77 (d, br, *J* = 8.7 Hz, 1 H), –11.73 (d, *J* = 2.4 Hz, 1 H), –16.04 (d, *J* = 2.4 Hz, 1 H).

**[Ru6(µ3-H)2(µ5-2-apyMe)(µ-CO)2(CO)14] (2b).** This complex (brownish black) was made by the same synthetic procedure as for **2a** in 77 % yield. Calcd for C22H8N2O16Ru6 (fw = 1162.79): C, 22.73; H, 0.69; N, 2.41. Found: C, 22.46; H, 0.70; N, 2.35. Positive FAB MS: *m/z* = 1164 [*M*+]. IR (CH2Cl2): (CO) = 2094 (m), 2068 (s), 2049 (s), 2033 (vs), 2014 (m), 1995 (w, sh), 1973 (m, br), 1954 (w, sh), 1860 (w, br), 1828 (w, br) cm-1. 1H NMR (CD2Cl2, 293 K):  = 7.21 (t, *J* = 7.8 Hz, 1 H), 6.64 (d, *J* = 7.8 Hz, 1 H), 5.76 (d, *J* = 7.8 Hz, 1 H), 2,56 (s, 3 H), –11.46 (d, *J* = 2.2 Hz, 1 H), –15.90 (d, *J* = 2.2 Hz, 1 H).

**[Ru6(µ3-H)2(µ5-2-apyPh)(µ-CO)2(CO)14] (2c) and [Ru6(µ3-H)(µ5-3-apyC6H4)(µ-CO)3(CO)13] (3c).** A solution of [Ru3(CO)12] (100 mg, 0.157 mmol) and 2-amino-6-phenylpyridine (13 mg, 0.076 mmol) in xylene (7 mL) was heated at reflux temperature for 30 min h. The color changed from orange to dark brown. The solvent was removed under high vacuum and the residue was dissolved in dichloromethane (5 mL). This solution was placed onto of a silica gel column (2  15 cm) packed in hexane. Hexane eluted a small amount of [Ru4(µ-H)4(CO)12]. Hexane-diethyl ether (50:1) eluted three bands. The first, dark brown, led to compound **2c** after solvent removal (33 mg, 35%). The second, dark green, led to compound **3c** after solvent removal (10 mg, 11%). The third band contained an as yet unidentified yellow compound (10 mg).

*Data for* ***2c****:* Calcd for C27H10N2O16Ru6 (fw = 1224.86): C, 26.48; H, 0.82; N, 2.29. Found: C, 26.44; H, 0.75; N, 2.32. Positive FAB MS: *m/z* = 1198 [(*M* – CO)+]. IR (CH2Cl2): (CO) = 2094 (m), 2069 (s), 2048 (s), 2032 (vs), 2013 (m, sh), 1994 (w, sh), 1972 (m), 1951 (w, sh), 1859 (m, br), 1827 (m, br) cm-1. 1H NMR (CD2Cl2, 293 K):  = 7.57-7.48 (m, 3 H), 7.32 (dd, *J* = 8.3, 7.5 Hz, 1 H), 7.20 (d, br, *J* = 7.1 Hz, 1 H), 7.11 (d, br, *J* = 7.5 Hz, 1 H), 6.62 (dd, *J* = 7.1, 1.2 Hz, 1 H), 5.90 (dd, *J* = 8.3, 1.2 Hz, 1 H), –11.46 (d, *J* = 2.4 Hz, 1 H), –15.87 (d, *J* = 2.4 Hz, 1 H).

*Data for* ***3c****:* Calcd for C27H8N2O16Ru6 (fw = 1222.86): C, 26.52; H, 0.66; N, 2.29. Found: C, 26.41; H, 0.57; N, 2.22. Positive FAB MS: *m/z* = 1224 [*M*+]. IR (CH2Cl2): (CO) = 2088 (m), 2050 (vs), 2028 (m), 2014 (m), 1997 (w, sh), 1961 (w, sh), 1880 (w), 1860 (m), 1841 (w) cm-1. 1H NMR (CD2Cl2, 293 K):  = 7.85 (dd, *J* = 7.5, 0.8 Hz 1 H), 7.64 (dd, *J* = 7.9, 1.6 Hz, 1 H), 7.39 (td, *J* = 7.5, 1.6 Hz, 1 H), 7.24-7.13 (m, 3 H), 5.15 (d, *J* = 7.1 Hz, 1 H), ‑11.62 (s, br, 1 H).

**Reaction of 3c with Hydrogen.** Hydrogen was slowly bubbled through a solution of complex **3c** (10 mg, 0.008 mmol) in THF (20 mL) at reflux temperature for 1 h. The color changed from dark green to dark brown. The IR spectrum of this solution indicated the complete transformation of complex **3c** into **2c**.

**[Ru6(µ3-H)2(µ5-2-apyMe)(µ-CO)2(CO)12(PPh3)2] (4b).** A solution of compound **2b** (50 mg, 0.043 mmol) and triphenylphosphane (28 mg, 0.107 mmol) was stirred in 1,2-dichloroethane (20 mL) at reflux temperature for 1 h. The color changed from dark brown to ruddy brown. The solvent was removed under reduced pressure and the residue was dissolved in dichloromethane (2 mL). This solution was placed onto of a silica gel column (2  15 cm) packed in hexane. Hexane-dichloromethane (4:1) eluted three bands. The second band, blood red, afforded an oil after solvent removal which was precipitated by stirring it in hexane (30 mL) to give compound **4b** as a dark red solid (20 mg, 29%). Calcd for C56H38N2O14P2Ru6 (fw = 1631.36): C, 41.23; H, 2.35; N, 1.72. Found: C, 41.44; H, 2.41; N, 1.63. Positive FAB MS: *m/z* = 1632 [*M*+]. IR (CH2Cl2): (CO) = 2068 (vw), 2053 (m), 2024 (vs), 2011 (vs), 1998 (m, sh), 1981 (w, sh), 1957 (m, br), 1933 (w, sh), 1841 (w, br), 1806 (w, br) cm-1. 1H NMR (CDCl3, 293 K):  = 7.90-6.80 (m, 31 H), 6.26 (d, *J* = 7.6 Hz, 1 H), 5.59 (d, *J* = 7.6 Hz, 1 H), 1.95 (s, 3 H), –11.45 (m, 1 H), –14.08 (m, 1 H). 31P1H} NMR (CDCl3, 293 K):  = 41.2 (s, 1 P), 20.66 (s, 1 P).

**[PPN][Ru6(µ3-H)(µ-H)2(µ5-2-apyMe)(µ-CO)(CO)14] (5b).** [PPN][BH4] (35 mg, 0.063 mmol) was added to a solution of compound **2b** (50 mg, 0.043 mmol) in dichloromethane (20 mL). The color changed from dark brown to dark green. The solution was evaporated to *ca*. 5 mL. Addition of diethyl ether (50 mL) induced the precipitation of a small amount of a cloudy solid. After filtration, the filtrate was evaporated to dryness to give a dark green oil that was precipitated by stirring it in hexane (30 mL) for 2 h (52 mg, 72%). Calcd for C57H39N3O15P2Ru6 (fw = 1674.39): C, 40.89; H, 2.35; N, 2.51. Found: C, 41.24; H, 2.21; N, 2.24. Negative FAB MS: *m/z* = 1137 [*M*–]. IR (CH2Cl2): (CO) = 2064 (m), 2033 (s), 1999 (vs), 1974 (m, sh), 1937 (m, br), 1777 (w, br) cm-1. 1H NMR (CDCl3, 293 K):  = 7.90-7.30 (m, 30 H), 6.89, (t, *J* = 7.9 Hz, 1 H), 6.24 (d, *J* = 7.9 Hz, 1 H), 6.01 (d, *J* = 7.9 Hz, 1 H), 2.42 (s, 3 H), –9.28 (s, 2 H), –15.53 (s, 1 H).

**(B) EXPERIMENTAL DETAILS FOR MEASUREMENT AND REFINEMENT OF X‑RAY DIFFRACTION DATA**

Diffraction data were collected at 120(2) K for **2c**·(CH2Cl2)0.5, **3c**, and **5b** and at 200(2) K for **4b** on a Nonius Kappa-CCD diffractometer, equipped with a 95-mm CCD camera on a -goniostat, using graphite-monochromated Cu-K radiation. All structures were solved by Patterson interpretation using the program DIRDIF-96.1 Empirical absorption corrections were applied using XABS22 for **2c**·(CH2Cl2)0.5 or SORTAV3 for **3c**, **4b**, and **5b**. Isotropic and full-matrix anisotropic least squares refinements were carried out using SHELXL-97.4 All non H atoms were refined anisotropically. Hydrogen atom positions were geometrically calculated and refined riding on their parent atoms, except the hydride atoms of **2c**·(CH2Cl2)0.5, which were located by Fourier difference maps, and the hydride atoms of **3c**, **4b**, and **5b**, which were calculated using the XHYDEX5 program and were refined with fixed coordinates and thermal parameters. The disordered solvent molecule of **2c**·(CH2Cl2)0.5 was treated with a mixture of constraints and restraints as described elsewhere.6 The molecular plots were made with the EUCLID program package.7 The WINGX program system8 was used thorough the structure determinations.

(1) Beurskens, P. T.; Beurskens, G.; Bosman, W. P.; de Gelder, R.; García-Granda, S.; Gould, R. O.; Israël, R.; Smits, J. M. M. *The DIRDIF-96 Program System*; Crystallography Laboratory, University of Nijmegen: Nijmegen, The Netherlands, 1996.

(2) Parkin, S.; Moezzi, B.; Hope, H. *J. Appl. Crystallogr*. **1995**, *28*, 53.

(3) Blessing, R. H. *Acta Cryst.,* **1995**, *A51*, 33.

(4) Sheldrick, G. M. *SHELXL97, version 97-2*; University of Göttingen: Göttingen, Germany, 1997.

(5) Orpen, A. G. *XHYDEX, A Program for Locating Hydrides in Metal Complexes*; *J. Chem. Soc., Dalton Trans.,* **1980**, 2509.

(6) Van der Maelen, J. F. *Crystallogr. Rev.* **1999**, *7*, 125.

(7) Spek, A. L. *The EUCLID Package*, in *Computational Crystallography*; Sayre, D., Ed.; Clarendon Press: Oxford, UK, 1982; p. 528.

(8) Farrugia, L. J. *J. Appl. Crystallogr.* **1999**, *32*, 837.

**(C) ORTEP REPRESENTATIONS OF COMPOUNDS 2c, 3c, 4b AND 5b**

**Figure SI-1.** ORTEP view of compound **2c** (thermal ellipsoids are drawn at the 50% probability level).

**Figure SI-2.** ORTEP view of compound **3c** (thermal ellipsoids are drawn at the 40% probability level).

**Figure SI-3.** ORTEP view of compound **4b** (thermal ellipsoids are drawn at the 30% probability level).

**Figure SI-4.** ORTEP view of the anionic part of compound **5b** (thermal ellipsoids are drawn at the 20% probability level).
